# Supplementary material for: Enhanced Bruton’s tyrosine kinase in B-cells and autoreactive IgA in patients with idiopathic pulmonary fibrosis
Source: PubMed Central journal article supplement (PMC6814043; doi:10.1186/s12931-019-1195-7), 2019-10-24

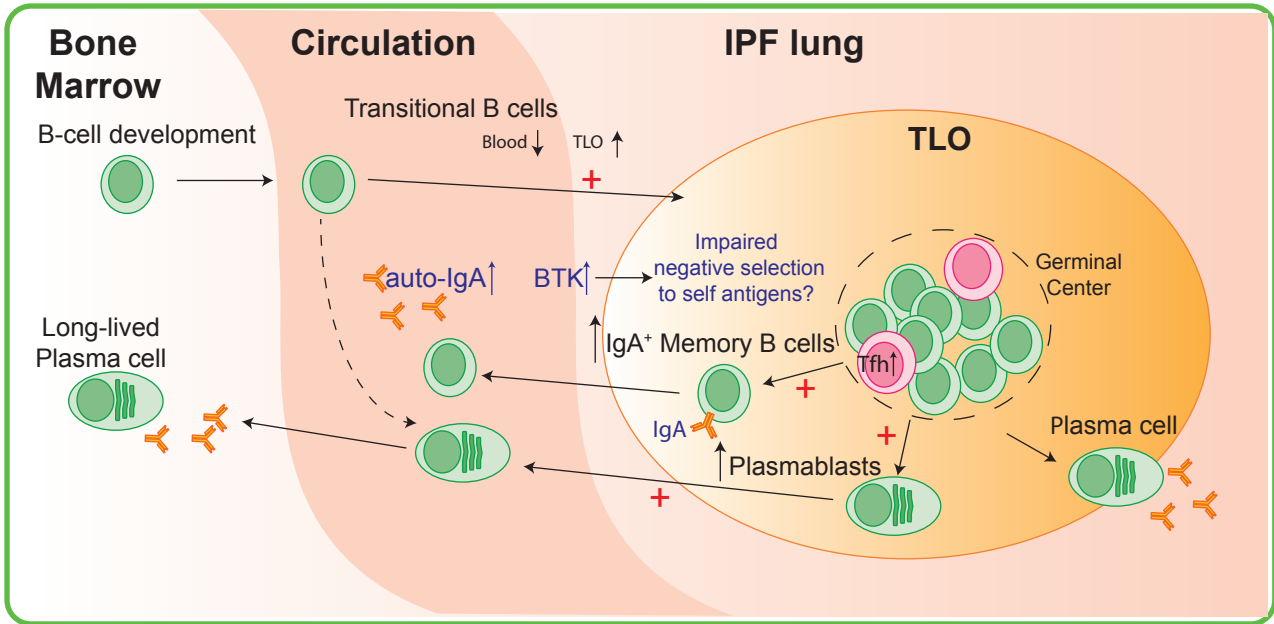

Supplement: 12931_2019_1195_MOESM9_ESM.pdf [file 12931_2019_1195_MOESM9_ESM.pdf]
